# Supplementary material for: Smartwatch Facilitated Remote Health Care for Patients Undergoing Transcatheter Aortic Valve Replacement Amid COVID-19 Pandemic
Source: bioRxiv or medRxiv preprint supplement (doi:10.1101/2021.05.22.21256870), 2021-05-23
Supplement: Supplementary file [file media-1.pdf]

**Supplementary Table 1. Procedural data**

|                                | <b>Number of patients, n = 100</b> |
|--------------------------------|------------------------------------|
| Second Valve, n(%)             | 4(4.0)                             |
| Pre-dilatation, n(%)           | 96(96.0)                           |
| THV type, n(%)                 |                                    |
| Self-expanding valve, n(%)     | 91(91.0)                           |
| Balloon expandable valve, n(%) | 9(9.0)                             |
| Device                         |                                    |
| Early-generation device, n(%)  | 65(65.0)                           |
| New-generation device, n(%)    | 35(35.0)                           |
| Post-dilatation, n(%)          | 63(63.0)                           |
| Death, n(%)                    | 0(0.0)                             |
| Myocardial infarction, n(%)    | 0(0.0)                             |
| Aortic dissection, n(%)        | 2(2.0)                             |
| Conversion to SAVR, n(%)       | 0(0.0)                             |
| Annular rupture, n(%)          | 0(0.0)                             |
| Coronary obstruction, n(%)     | 0(0.0)                             |

Data are presented as no. (%).

SAVR, surgical aortic valve replacement; THV, transcatheter heart valve
