# Supplementary material for: Smartwatch Facilitated Remote Health Care for Patients Undergoing Transcatheter Aortic Valve Replacement Amid COVID-19 Pandemic
Source: bioRxiv or medRxiv preprint supplement (doi:10.1101/2021.05.22.21256870), 2021-05-23
Supplement: Supplementary file [file media-2.pdf]

**Supplementary Table 2. Conduction disturbance detected by smartwatch leading to therapy**

| <b>Patient #</b> | <b>Cardiovascular symptoms</b> | <b>Conduction Abnormalities</b>                                   | <b>Detected by watch</b> | <b>Readmission</b> | <b>Therapy</b>                     |
|------------------|--------------------------------|-------------------------------------------------------------------|--------------------------|--------------------|------------------------------------|
| 1#               | cardiogenic syncope            | af, LBBB, sinus arrest for 8.46 seconds                           | Yes                      | Yes                | pacemaker                          |
| 2#               | palpitations                   | frequent ventricular premature                                    | Yes                      | No                 | beta-block                         |
| 3#               | no symptoms                    | third-degree atrioventricular block, sinus arrest for 4.6 seconds | Yes                      | Yes                | pacemaker                          |
| 4#               | palpitations                   | frequent ventricular premature                                    | Yes                      | No                 | potassium chloride for hypokalemia |
| 5#               | dizziness, nausea              | frequent ventricular premature                                    | Yes                      | Yes                | beta-block                         |
| 6#               | no symptoms                    | high-degree atrioventricular block                                | Yes                      | Yes                | pacemaker                          |
| 7#               | dizziness                      | af, LBBB, prolonged RR interval                                   | Yes                      | Yes                | pacemaker                          |
| 8#               | dizziness                      | af with hypotension                                               | Yes                      | Yes                | amiodarone                         |
| 9#               | palpitations                   | frequent atrial premature with IVCD                               | Yes                      | No                 | beta-block                         |

af, atrial fibrillation; IVCD, intraventricular conduction disturbance
